# Supplementary material for: Standardizing Benchmark Dose Calculations to Improve Science-Based Decisions in Human Health Assessments
Source: PubMed Central journal article supplement (PMC4014768; doi:10.1289/ehp.1307539), 2014-02-25
Supplement: ehp.1307539.s001.pdf [file ehp.1307539.s001.pdf]

## **Supplemental Material**

# **Standardizing Benchmark Dose Calculations to Improve Science-Based Decisions in Human Health Assessments**

Jessica A. Wignall, Andrew J. Shapiro, Fred A. Wright, Tracey J. Woodruff, Weihsueh A. Chiu, Kathryn Z. Guyton, and Ivan Rusyn

| <b>Table of Contents</b>                                                                                                                               | <b>Page</b> |
|--------------------------------------------------------------------------------------------------------------------------------------------------------|-------------|
| <b>Figure S1.</b> Data and chemical curation process for current study                                                                                 | 2           |
| <b>Figure S2.</b> BMD modeling flowchart of the standardized approach as applied in this study                                                         | 3           |
| <b>Figure S3.</b> Number of models of each type recommended for use in continuous and dichotomous dose-response data sets                              | 4           |
| <b>Figure S4.</b> Types and fraction of all viable model warnings given by BMDS Wizard for viable models                                               | 5           |
| <b>Figure S5.</b> Distribution of BMDL values from human health assessments and batch-calculated BMD/Ls                                                | 6           |
| <b>Figure S6.</b> Correlations of batch-calculated BMDs and BMDLs with LOAELs and all PODs reported in risk assessments                                | 7           |
| <b>Figure S7.</b> Array of batch-calculated BMDLs compared to IRIS NOAEL and RfD for critical effects of di(2-ethylhexyl)adipate and pentachlorophenol | 8           |
| <b>Figure S8.</b> Reasons for model failure across Questionable and Unusable models                                                                    | 9           |
| <b>Figure S9.</b> Number of dose groups for nonviable vs. viable models                                                                                | 10          |
| <b>Table S1.</b> Decision logic for BMDS Wizard                                                                                                        | 11          |
| <b>Table S2.</b> List of chemicals with batch-calculated BMD/Ls10/1SD and NOAELs                                                                       | 12          |
| <b>Table S3.</b> Comparison between batch processing BMRs and BMRs from original human health assessments                                              | 14          |

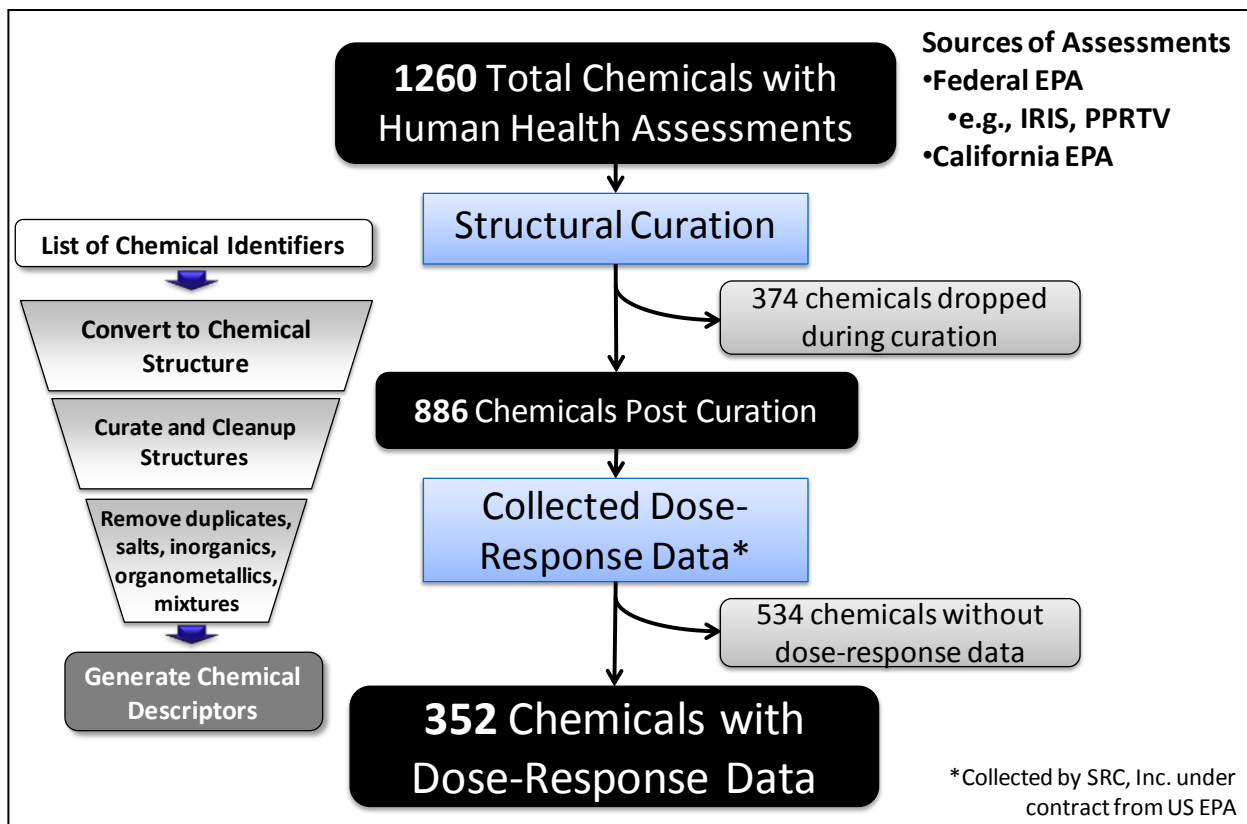

**Figure S1.** Data and chemical curation process for current study.

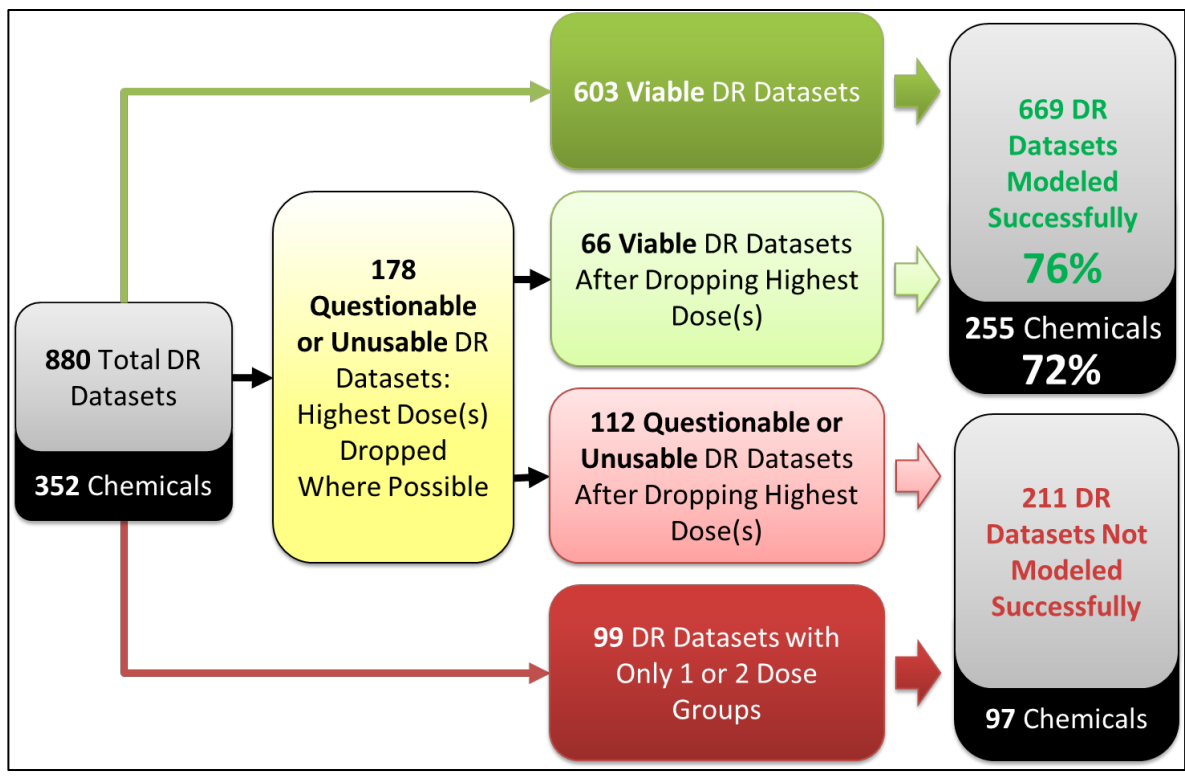

**Figure S2.** BMD modeling flowchart of the standardized approach as applied in this study.

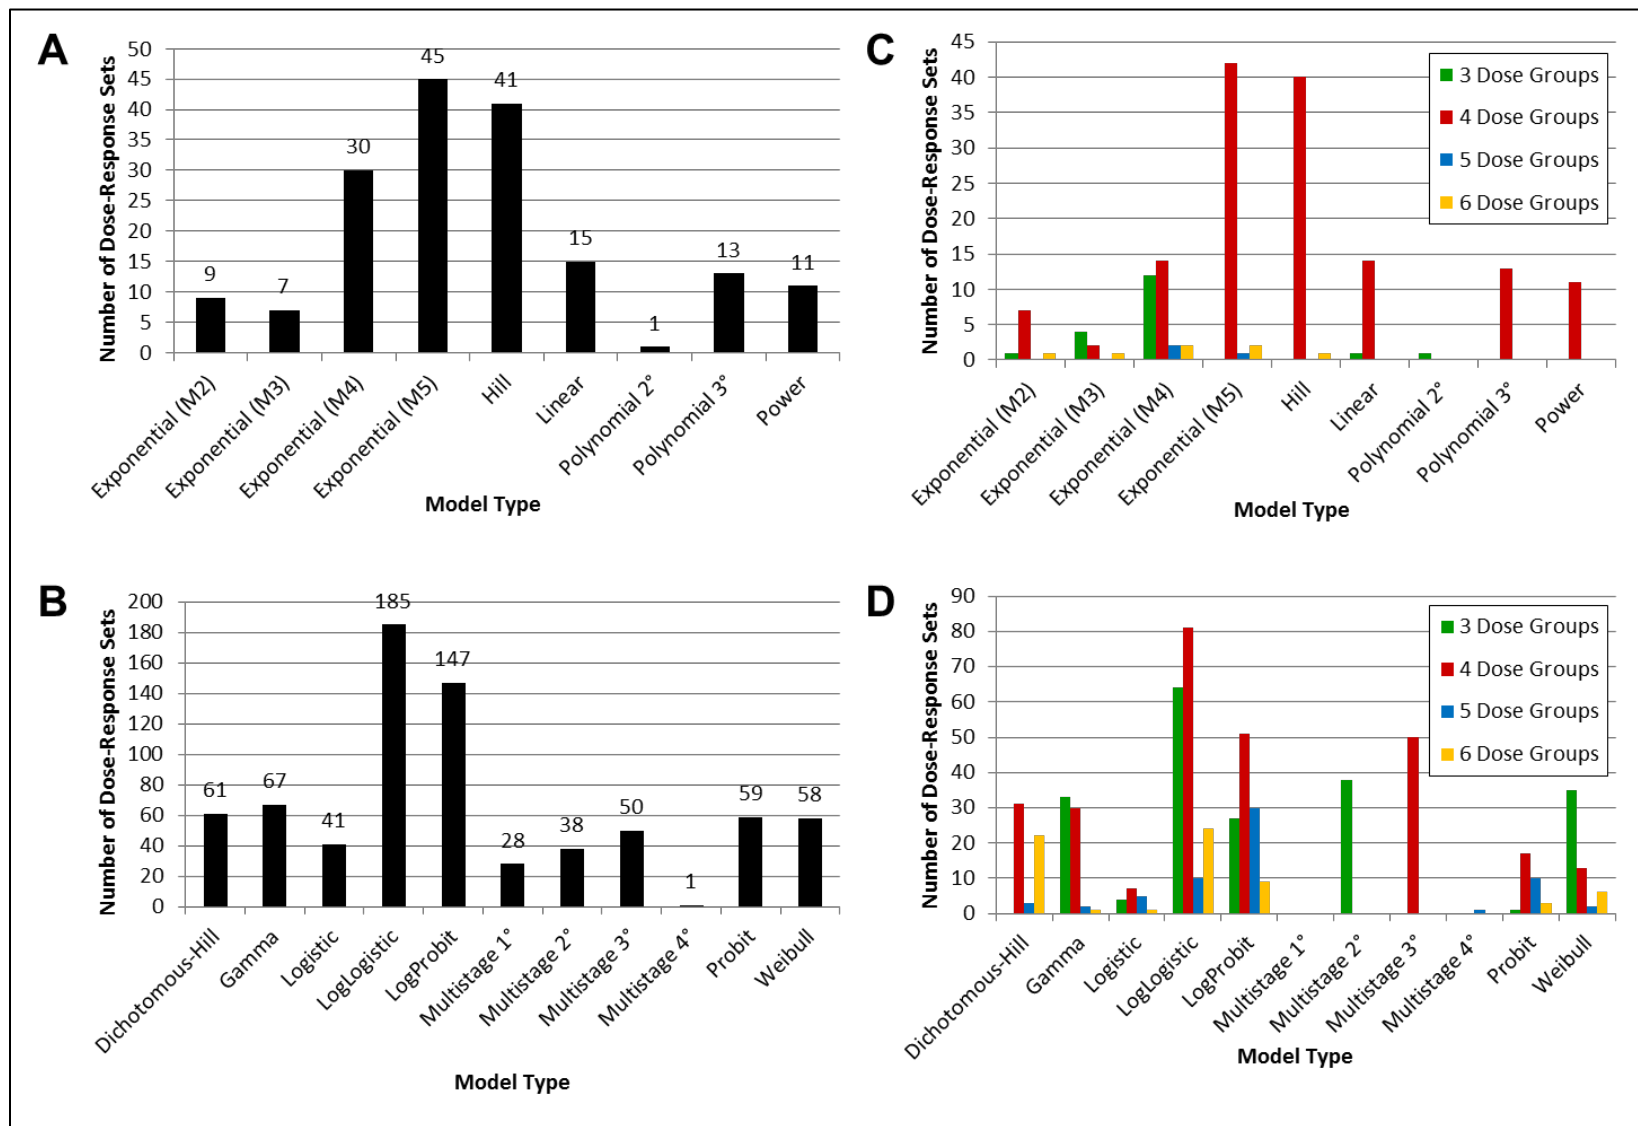

**Figure S3.** Number of models of each type recommended for use in continuous (A) and dichotomous (B) dose-response data sets; according to number of dose groups for continuous (C) and dichotomous (D) dose-response data sets.

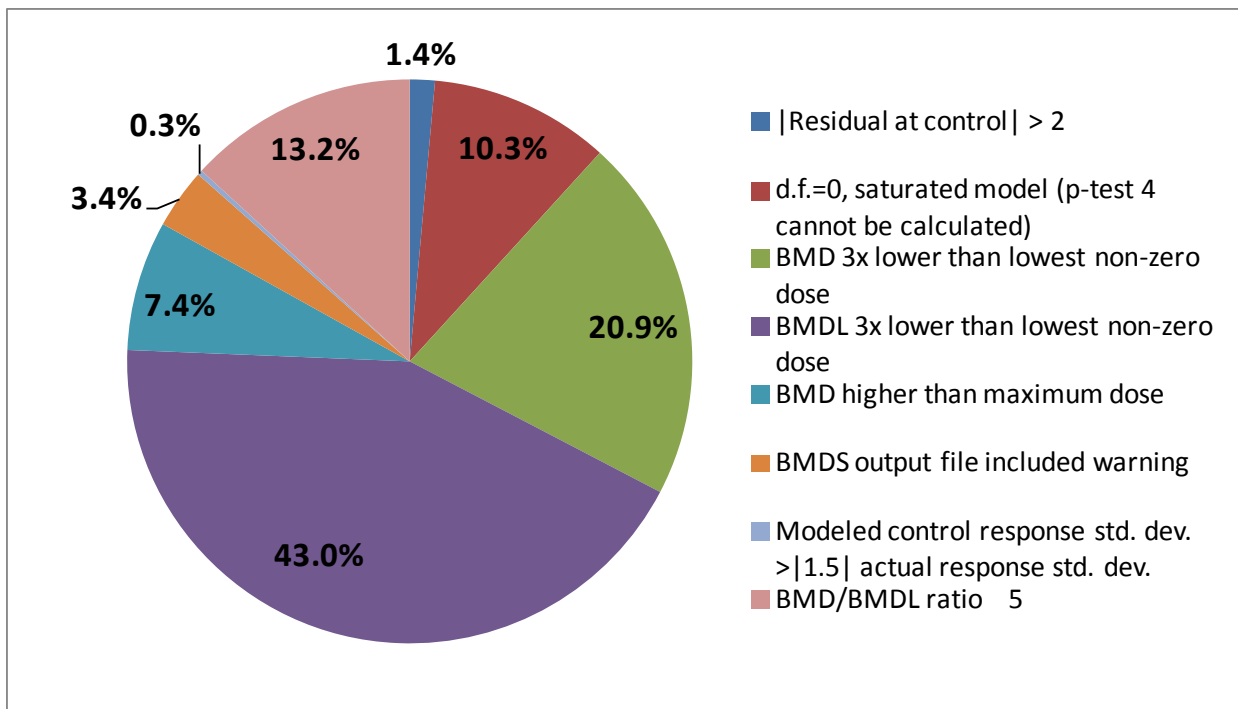

**Figure S4.** Types and fraction of all viable model warnings given by BMDS Wizard for viable models.

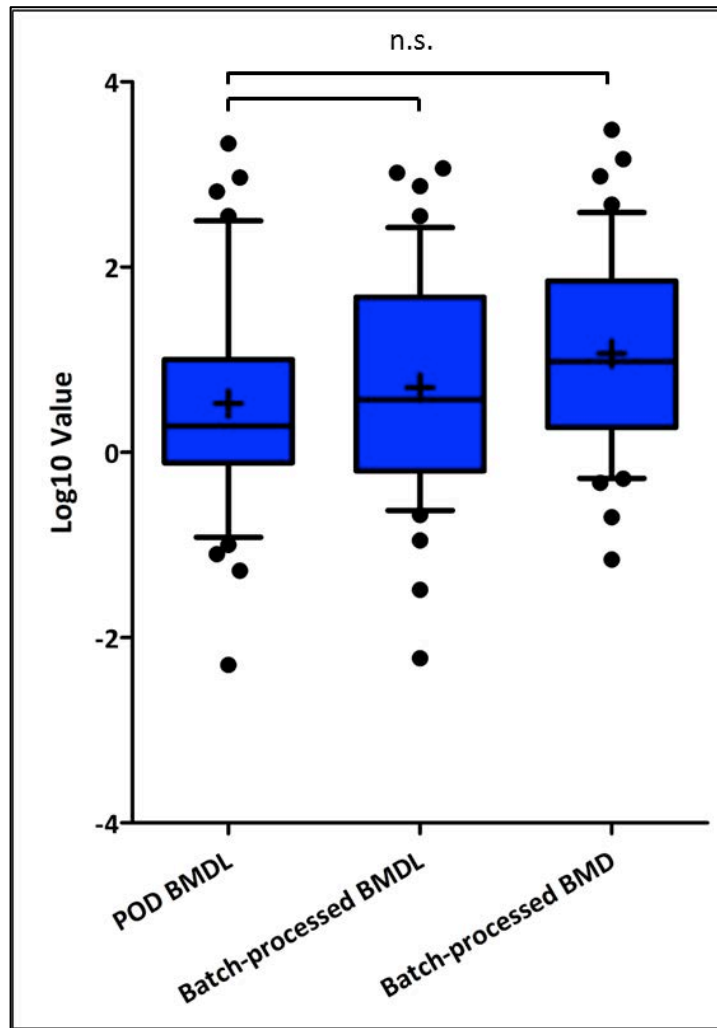

**Figure S5.** Distribution of BMDL values from human health assessments and batch-calculated BMD/Ls. Whiskers represent 10th to 90th percentile. Plus sign indicates the mean.

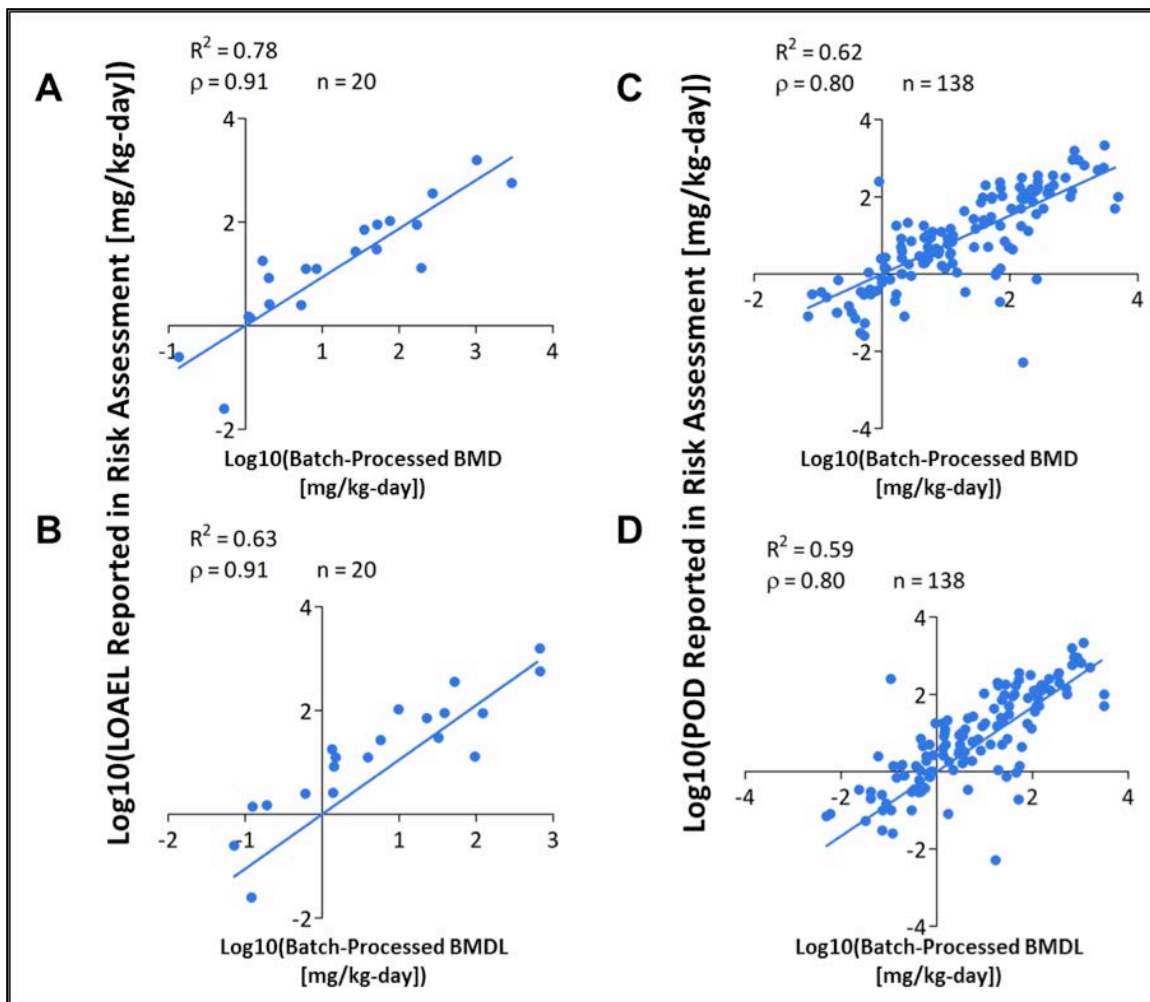

**Figure S6.** Correlations of batch-calculated BMDs and BMDLs with LOAELs (A,B) and all PODs (C,D) reported in risk assessments.  $R^2$ , squared Pearson correlations.  $\rho$ , Spearman correlations. Regression line is through the origin.

## A Di(2-ethylhexyl)adipate

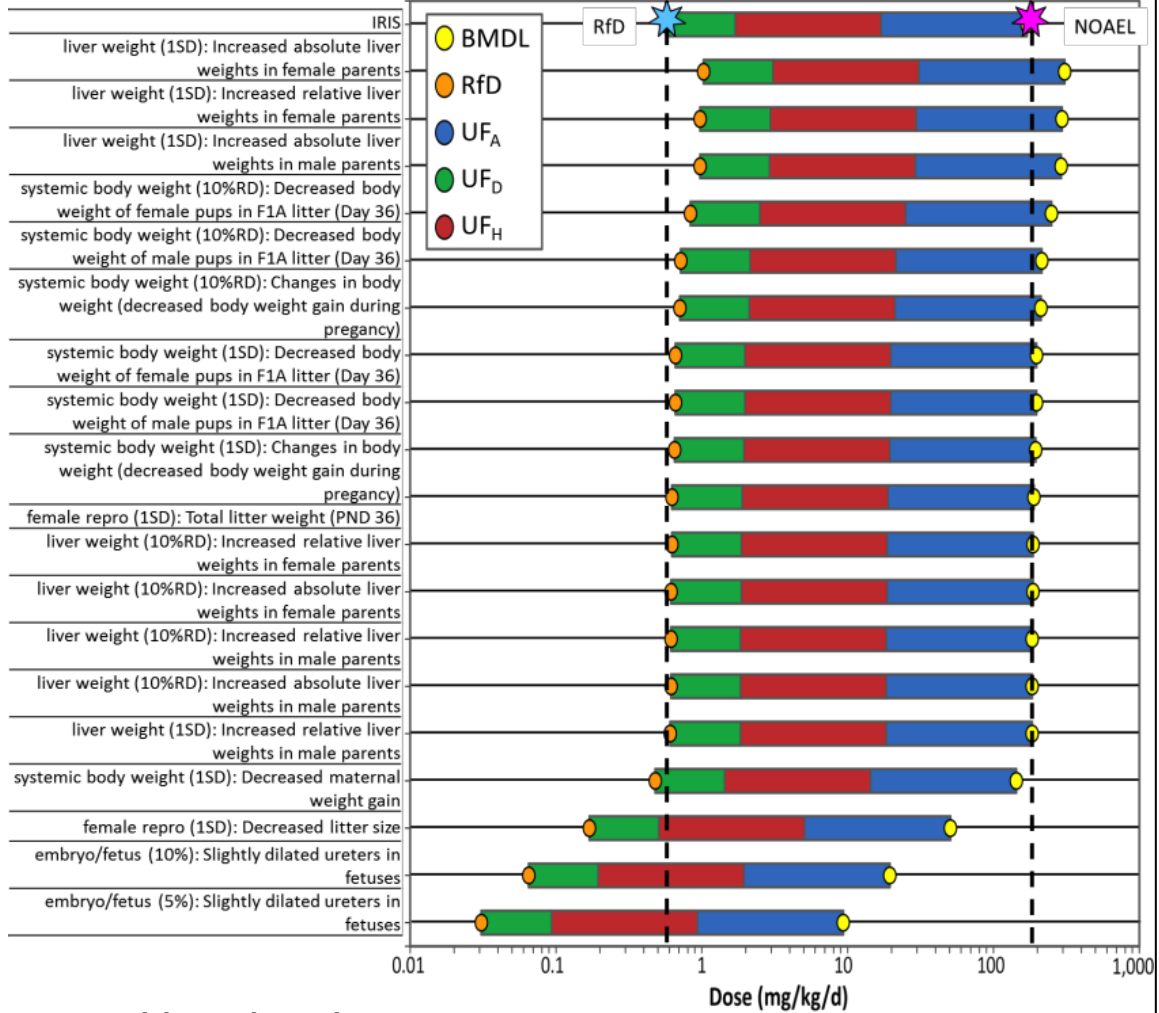

## B Pentachlorophenol

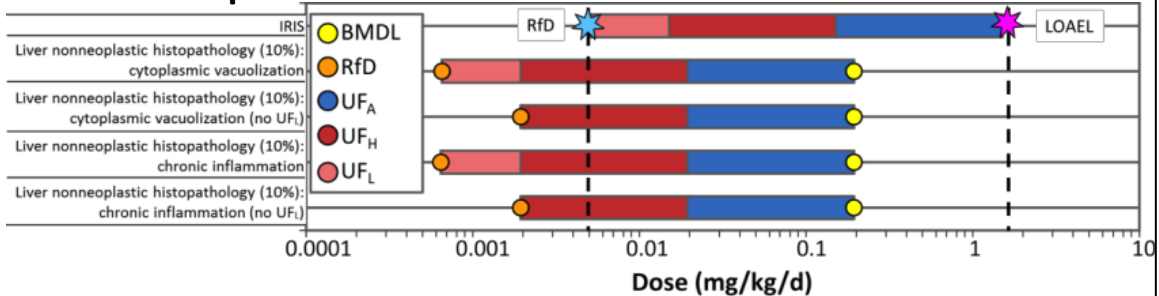

**Figure S7.** Array of batch-calculated BMDLs compared to IRIS NOAEL and RfD for critical effects of di(2-ethylhexyl)adipate (A) and pentachlorophenol (B). Yellow circles, batch-calculated BMDLs; orange circles, RfDs based on batch-calculated BMDLs; colored bars, uncertainty factors; pink stars, human health assessment PODs; blue stars, human health assessment RfDs.



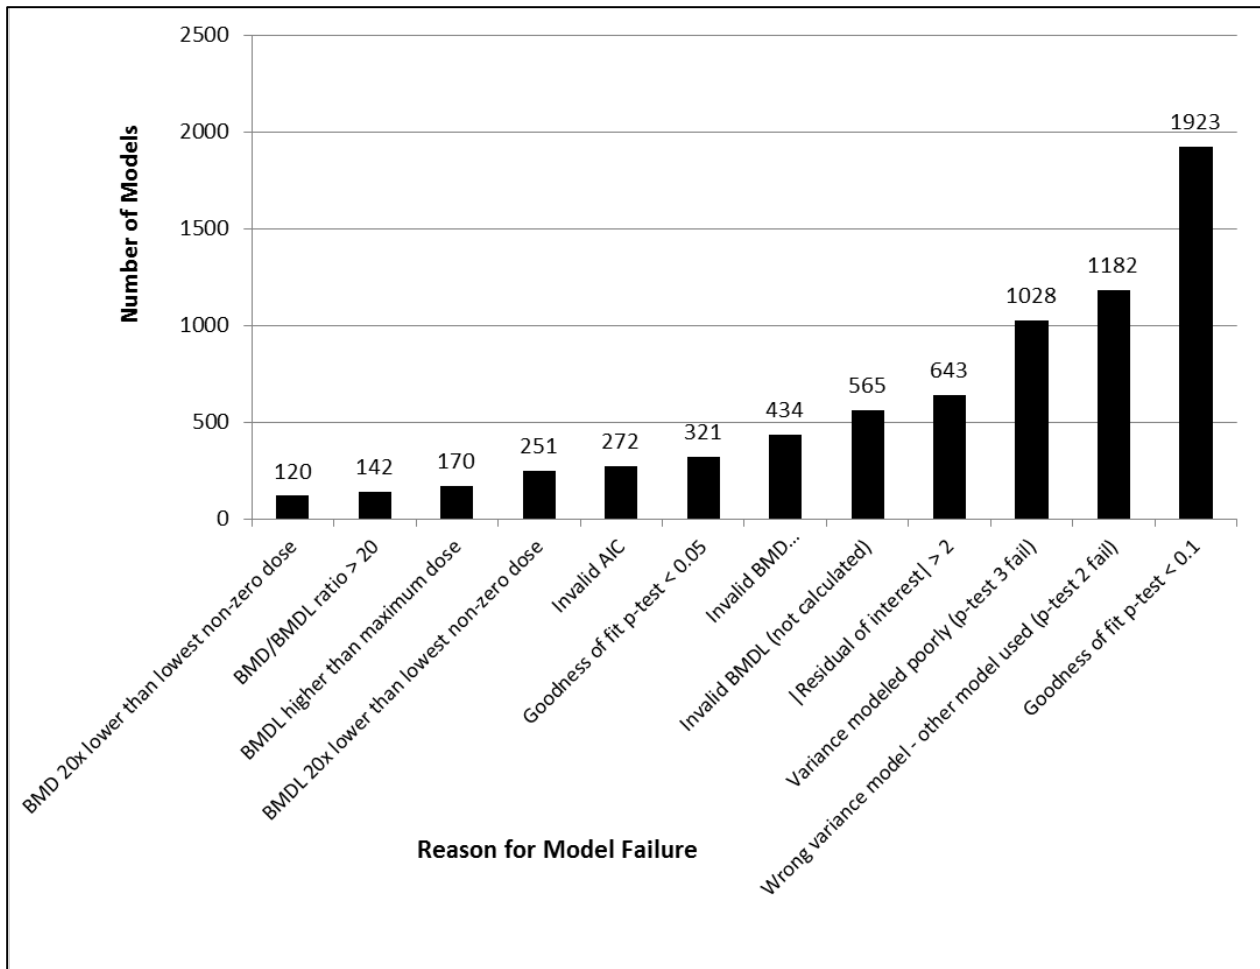

**Figure S8.** Reasons for model failure across Questionable and Unusable models.



**Table S1.** Decision logic for BMDS Wizard.

| Test Description                      | Test On/Off: Dichotomous | Test On/Off: Dichotomous Cancer | Test On/Off: Continuous | Test Threshold (where appropriate) | Model Category if Test is True | Notes to Show                                                       |
|---------------------------------------|--------------------------|---------------------------------|-------------------------|------------------------------------|--------------------------------|---------------------------------------------------------------------|
| BMD is not calculated                 | on                       | on                              | on                      | N/A                                | Unusable                       | Invalid BMD                                                         |
| BMDL is not calculated                | on                       | on                              | on                      | N/A                                | Unusable                       | Invalid BMDL                                                        |
| BMDU is not calculated                | off                      | off                             | off                     | N/A                                | Unusable                       | Invalid BMDU                                                        |
| AIC is not calculated                 | on                       | on                              | on                      | N/A                                | Unusable                       | Invalid AIC                                                         |
| Wrong variance model                  | off                      | off                             | on                      | 0.1                                | Unusable                       | Wrong variance model (p-test 2 fail)                                |
| Variance modeled poorly               | off                      | off                             | on                      | 0.1                                | Unusable                       | Variance modeled poorly (p-test 3 fail)                             |
| Goodness of fit p-test                | on                       | off                             | on                      | 0.1                                | Questionable                   | Goodness of fit p-test < 0.1                                        |
| Goodness of fit p-test (cancer)       | off                      | on                              | off                     | 0.05                               | Questionable                   | Goodness of fit p-test < 0.05                                       |
| Ratio of BMD/BMDL (serious)           | on                       | on                              | on                      | 20                                 | Questionable                   | BMD/BMDL ratio > 20                                                 |
| Ratio of BMD/BMDL (caution)           | on                       | on                              | on                      | 5                                  | Viable (With warning)          | BMD/BMDL ratio > 5                                                  |
| Abs(Residual of interest) too large   | on                       | on                              | on                      | 2                                  | Questionable                   | Residual of interest  > 2                                           |
| BMDS Model Warnings                   | on                       | on                              | on                      | N/A                                | Viable (With warning)          | BMDS output file included warning                                   |
| BMD higher than highest dose          | on                       | on                              | on                      | 1                                  | Viable (With warning)          | BMD higher than maximum dose                                        |
| BMDL higher than highest dose         | on                       | on                              | on                      | 1                                  | Questionable                   | BMDL higher than maximum dose                                       |
| BMD lower than lowest dose (warning)  | on                       | on                              | on                      | 3                                  | Viable (With warning)          | BMD 3x lower than lowest non-zero dose                              |
| BMDL lower than lowest dose (warning) | on                       | on                              | on                      | 3                                  | Viable (With warning)          | BMDL 3x lower than lowest non-zero dose                             |
| BMD lower than lowest dose (serious)  | on                       | on                              | on                      | 20                                 | Questionable                   | BMD 20x lower than lowest non-zero dose                             |
| BMDL lower than lowest dose (serious) | on                       | on                              | on                      | 20                                 | Questionable                   | BMDL 20x lower than lowest non-zero dose                            |
| Abs(Residual at control) too large    | on                       | on                              | on                      | 2                                  | Viable (With warning)          | Residual at control  > 2                                            |
| Poor control dose std. dev.           | off                      | off                             | on                      | 1.5                                | Viable (With warning)          | Modeled control response std. dev. > 1.5  actual response std. dev. |
| d.f. equals 0                         | on                       | on                              | on                      | NA                                 | Viable (With warning)          | d.f.=0, saturated model (p-test 4 cannot be calculated)             |

**Table S2.** List of chemicals with batch-calculated BMD/Ls10/1SD and NOAELs.

| CAS       | Chemical Name                           |
|-----------|-----------------------------------------|
| 120832    | 2,4-Dichlorophenol                      |
| 95943     | 1,2,4,5-Tetrachlorobenzene              |
| 78488     | Tribufos                                |
| 150505    | Merphos                                 |
| 96128     | 1,2-Dibromo-3-Chloropropane             |
| 12789036  | Chlordane, technical grade              |
| 100005    | Chloronitrobenzene, p-                  |
| 2385855   | Mirex                                   |
| 105511964 | Clodinafop-propargyl                    |
| 99650     | 1,3-Dinitrobenzene                      |
| 100254    | Dinitrobenzene, 1,4-                    |
| 528290    | 1,2-Dinitrobenzene                      |
| 84720     | Ethyl Carbethoxymethyl Phthalate        |
| 32536520  | Benzene, 1,1'-oxybis-, octabromo deriv. |
| 115297    | Endosulfan                              |
| 74839     | Methyl bromide                          |
| 99354     | 1,3,5-Trinitrobenzene                   |
| 121142    | 2,4-Dinitrotoluene                      |
| 121824    | RDX                                     |
| 615543    | 1,2,4-Tribromobenzene                   |
| 110861    | Pyridine                                |
| 79005     | 1,1,2-Trichloroethane                   |
| 118741    | Hexachlorobenzene                       |
| 124481    | Dibromochloromethane                    |
| 135410207 | Acetamiprid                             |
| 75252     | Bromoform                               |
| 106376    | 1,4-Dibromobenzene                      |
| 95578     | 2-Chlorophenol                          |
| 75865     | Acetone Cyanohydrin                     |
| 175013180 | Pyraclostrobin                          |
| 606202    | Dinitrotoluene, 2,6-                    |
| 110009    | Furan                                   |
| 75990     | Dalapon                                 |
| 25057890  | Bentazone                               |
| 111911    | Bis(2-Chloroethoxy)Methane              |
| 109693    | 1-Chlorobutane                          |
| 126987    | Methacrylonitrile                       |
| 145701231 | Florasulam                              |
| 50000     | Formaldehyde                            |
| 68122     | N,N'-Dimethylformamide                  |

| CAS       | Chemical Name                     |
|-----------|-----------------------------------|
| 58902     | 2,3,4,6-Tetrachlorophenol         |
| 239110157 | Fluopicolide                      |
| 100425    | Styrene                           |
| 140578    | Aramite                           |
| 79622596  | Fluazinam                         |
| 108918    | Cyclohexanamine                   |
| 103231    | Di-2-Ethylhexyl Adipate           |
| 68157608  | Forchlorfenuron                   |
| 142289    | Dichloropropane, 1,3-             |
| 8003347   | Pyrethrins                        |
| 1330207   | Xylenes (mixed isomers)           |
| 2691410   | Octogen                           |
| 131983727 | Triticonazole                     |
| 556887    | Nitroguanidine                    |
| 206440    | Fluoranthene                      |
| 86737     | 9H-Fluorene                       |
| 85687     | Butyl Benzyl Phthalate            |
| 129000    | Pyrene                            |
| 108601    | Bis(2-chloro-1-methylethyl) ether |
| 112281773 | Tetraconazole                     |
| 78591     | Isophorone                        |
| 108101    | 4-methyl-2-Pentanone              |
| 83329     | Acenaphthene                      |
| 123308    | Aminophenol, p-                   |
| 111991094 | Nicosulfuron                      |
| 111900    | Diethylene Glycol Monoethyl Ether |
| 84742     | Dibutyl Phthalate                 |
| 107211    | Ethylene glycol                   |
| 78831     | Isobutyl Alcohol                  |
| 422556089 | Pyroxsulam                        |
| 100210    | Phthalic Acid, p-                 |
| 67641     | Acetone                           |
| 67561     | Methanol                          |
| 105602    | Caprolactam                       |
| 108054    | Vinyl Acetate                     |

**Table S3.** Comparison between batch processing BMRs and BMRs from original human health assessments.

| CAS      | Chemical Name                        | Source | Effect                       | BMR used in batch processing | Lowest BMD from batch processing | Lowest BMDL from batch processing | Original assessment POD | Effect Level of POD | Original assessment POD BMR | Reason for selection of POD BMR                                                                                                                                                                                                                                                                                                                                                                         | Assessment POD BMR same as batch processing BMR? |
|----------|--------------------------------------|--------|------------------------------|------------------------------|----------------------------------|-----------------------------------|-------------------------|---------------------|-----------------------------|---------------------------------------------------------------------------------------------------------------------------------------------------------------------------------------------------------------------------------------------------------------------------------------------------------------------------------------------------------------------------------------------------------|--------------------------------------------------|
| 143500   | Kepon                                | IRIS   | nonneoplastic histopathology | 10%                          | 0.070                            | 0.006                             | 0.08                    | BMDL10              | 10%                         | BMR of a 10% increase in glomerulosclerosis was selected under an assumption that it represents a minimal biologically significant change                                                                                                                                                                                                                                                               | same                                             |
| 87683    | Hexachlorobutadiene                  | PPRTV  | nonneoplastic histopathology | 10%                          | 0.200                            | 0.112                             | 0.1                     | BMDL                | 10%                         | Rationale not provided                                                                                                                                                                                                                                                                                                                                                                                  | same                                             |
| 5436431  | 2,2',4,4'-Tetrabromodiphenyl ether   | IRIS   | neurobehavior                | 1SD                          | 0.470                            | 0.345                             | 0.35                    | BMDL1SD             | 1SD                         | In the case of motor activity, there is no specific change that is generally regarded as indicative of an adverse response. In the absence of some idea of the level of response to consider adverse, the benchmark response (BMR) selected was a change in the mean equal to one SD from the control mean                                                                                              | same                                             |
| 60348609 | 2,2',4,4',5-Pentabromodiphenyl ether | IRIS   | neurobehavior                | 1SD                          | 0.521                            | 0.425                             | 0.29                    | BMDL1SD             | 1SD                         | A change in the mean equal to 1 SD of the control mean was assumed to represent a minimal biologically significant change                                                                                                                                                                                                                                                                               | same                                             |
| 79061    | Acrylamide                           | IRIS   | nonneoplastic histopathology | 10%                          | 0.538                            | 0.033                             | 0.053                   | BMDL(HED)           | 5%                          | A BMR of 5% extra risk was selected for the following reasons: (1) this effect level is considered to be a minimal biologically significant change given the critical effect of degenerative nerve changes; (2) the BMDL <sub>5</sub> remained near the range of observation; and (3) the 5% extra risk level is supportable given the relatively large number of animals used in the principal studies | different                                        |

| CAS    | Chemical Name                       | Source | Effect                       | BMR used in batch processing | Lowest BMD from batch processing | Lowest BMDL from batch processing | Original assessment POD | Effect Level of POD | Original assessment POD BMR | Reason for selection of POD BMR                                                                                                                                                                                                                                                                                  | Assessment POD BMR same as batch processing BMR? |
|--------|-------------------------------------|--------|------------------------------|------------------------------|----------------------------------|-----------------------------------|-------------------------|---------------------|-----------------------------|------------------------------------------------------------------------------------------------------------------------------------------------------------------------------------------------------------------------------------------------------------------------------------------------------------------|--------------------------------------------------|
| 96184  | 1,2,3-Trichloropropane              | IRIS   | organ weight                 | 1SD                          | 0.618                            | 0.448                             | 1.1                     | BMDL(adj)           | 10%                         | BMR of a 10% change in absolute liver weight was selected under an assumption that it represents a minimal biologically significant change                                                                                                                                                                       | different                                        |
| 88733  | Chloronitrobenzene, o-              | PPRTV  | nonneoplastic histopathology | 10%                          | 0.672                            | 0.299                             | 0.3                     | BMDL                | 10%                         | In accordance with the U.S. EPA (2000) BMD methodology, the default benchmark response (BMR) of a 10% increase in extra risk was used as the basis for the BMD (BMD10), with the BMDL10 represented by the 95% lower confidence limit on the BMD10.                                                              | same                                             |
| 100016 | Nitroaniline, 4-                    | PPRTV  | none                         | 1SD                          | 0.828                            | 0.574                             | 0.37                    | BMDL                | 1SD                         | Although data are available to suggest methemoglobin levels in blood can produce adverse effects in humans, no corresponding data were available for rodents. Therefore, a default benchmark response of 1 SD above the control mean was used to estimate the benchmark dose, as recommended by U.S. EPA (2000). | same                                             |
| 80079  | Sulfonylbis(4-chlorobenzene), 1,1'- | PPRTV  | nonneoplastic histopathology | 10%                          | 0.980                            | 0.212                             | 0.79                    | BMDL                | 10%                         | The default benchmark response of 10% for quantal data                                                                                                                                                                                                                                                           | same                                             |
| 67721  | Hexachloroethane                    | IRIS   | nonneoplastic histopathology | 10%                          | 1.344                            | 0.728                             | 0.728                   | BMDL10              | 10%                         | In this case, a BMR of a 10% increase in the incidence of renal tubule atrophy and degeneration was selected under an assumption that it represents a minimal biologically significant change                                                                                                                    | same                                             |
| 67663  | Chloroform                          | IRIS   | #N/A                         | 10%                          | 2.085                            | 0.832                             | 1                       | BMDL10              | 10%                         | Rationale not provided                                                                                                                                                                                                                                                                                           | same                                             |

| CAS      | Chemical Name                                | Source | Effect                       | BMR used in batch processing | Lowest BMD from batch processing | Lowest BMDL from batch processing | Original assessment POD | Effect Level of POD | Original assessment POD BMR | Reason for selection of POD BMR                                                                                                                                                                                   | Assessment POD BMR same as batch processing BMR? |
|----------|----------------------------------------------|--------|------------------------------|------------------------------|----------------------------------|-----------------------------------|-------------------------|---------------------|-----------------------------|-------------------------------------------------------------------------------------------------------------------------------------------------------------------------------------------------------------------|--------------------------------------------------|
| 98953    | Nitrobenzene                                 | IRIS   | hematology                   | 1SD                          | 2.624                            | 1.812                             | 1.8                     | BMDL1SD             | 1SD                         | In this case, a BMR of a 10% change in either of the respiratory effects was selected under an assumption that it represents a minimal biologically significant change.                                           | same                                             |
| 42576023 | Bifenox                                      | PPRTV  | nonneoplastic histopathology | 10%                          | 2.878                            | 0.658                             | 0.9                     | BMDL                | 10%                         | Rationale not provided                                                                                                                                                                                            | same                                             |
| 108985   | Benzenethiol                                 | PPRTV  | organ weight                 | 1SD                          | 3.853                            | 2.919                             | 2.91                    | BMDL                | 1SD                         | Per EPA policy, in the absence of a biologically relevant benchmark response level (BMR), a default BMR of 1 SD above the control mean is used.                                                                   | same                                             |
| 98566    | Chlorobenzotrifluoride, 4-                   | PPRTV  | clinical chemistry           | 1SD                          | 4.640                            | 2.963                             | 8.8                     | BMDL                | 1SD                         | Rationale not provided                                                                                                                                                                                            | same                                             |
| 13674878 | Tris(1,3-Dichloro-2-Propyl) Phosphate (TdcP) | ATSDR  | nonneoplastic histopathology | 10%                          | 4.708                            | 3.813                             | 1.94                    | BMDL10              | 10%                         | In the absence of a clear criteria as to what level of change in kidney weight should be considered adverse, the BMR was defined as a change in mean kidney weight equal to 1 SD from the control mean (EPA 2000) | same                                             |
| 542756   | 1,3-Dichloropropene, mixed isomer            | IRIS   | nonneoplastic histopathology | 10%                          | 5.241                            | 3.601                             | 3.4                     | BMDL10              | 10%                         | Rationale not provided                                                                                                                                                                                            | same                                             |
| 123739   | trans-Crotonaldehyde                         | PPRTV  | nonneoplastic histopathology | 10%                          | 5.599                            | 3.001                             | 3.4                     | BMDL                | 10%                         | Rationale not provided                                                                                                                                                                                            | same                                             |



| CAS    | Chemical Name                            | Source | Effect                       | BMR used in batch processing | Lowest BMD from batch processing | Lowest BMDL from batch processing | Original assessment POD | Effect Level of POD | Original assessment POD BMR | Reason for selection of POD BMR                                                                                                                                                                                                                                                                                                                                                                                                                                                                                                                                                                                        | Assessment POD BMR same as batch processing BMR? |
|--------|------------------------------------------|--------|------------------------------|------------------------------|----------------------------------|-----------------------------------|-------------------------|---------------------|-----------------------------|------------------------------------------------------------------------------------------------------------------------------------------------------------------------------------------------------------------------------------------------------------------------------------------------------------------------------------------------------------------------------------------------------------------------------------------------------------------------------------------------------------------------------------------------------------------------------------------------------------------------|--------------------------------------------------|
| 75354  | 1,1-Dichloroethylene                     | IRIS   | nonneoplastic histopathology | 10%                          | 7.048                            | 0.517                             | 4.6                     | BMDL10              | 10%                         | No exposure-related neoplastic changes occurred at any exposure. No hepatocellular necrosis was evident at any exposure. Based on the minimal nature of the hepatocellular swelling reported by the authors and no change in liver weight, no change in clinical chemistry measurements diagnostic for liver damage, and no other indication of abnormal liver function, the hepatocellular swelling is not considered biologically significant or an adverse effect in this study. The statistically significant hepatocellular midzonal fatty change, however, is considered a minimal adverse effect in this study. | same                                             |
| 109864 | 2-Methoxyethanol                         | PPRTV  | reproduction                 | 10%                          | 8.660                            | 3.470                             | 1.64                    | BMDL                | 10%                         | In accordance with EPA (2000) guidance, BMDs and BMDLs associated with an extra risk of 10% BMR generally are calculated for all models; a 5% BMR is used for developmental data.                                                                                                                                                                                                                                                                                                                                                                                                                                      | same                                             |
| 110496 | Ethylene Glycol Monomethyl Ether acetate | PPRTV  | other                        | 10%                          | 8.660                            | 3.470                             | 1.64                    | BMDL                | 10%                         | In accordance with EPA (2000) guidance, BMDs and BMDLs associated with an extra risk of 10% BMR generally are calculated for all models; a 5% BMR is used for developmental data.                                                                                                                                                                                                                                                                                                                                                                                                                                      | same                                             |
| 77474  | Hexachlorocyclopentadiene                | IRIS   | nonneoplastic histopathology | 10%                          | 10.665                           | 5.596                             | 6                       | BMDL10              | 10%                         | Rationale not provided                                                                                                                                                                                                                                                                                                                                                                                                                                                                                                                                                                                                 | same                                             |

| CAS    | Chemical Name                | Source | Effect                       | BMR used in batch processing | Lowest BMD from batch processing | Lowest BMDL from batch processing | Original assessment POD | Effect Level of POD | Original assessment POD BMR | Reason for selection of POD BMR                                                                                                                                                                                                                                                                                                                                                                                                                                                                                                                                                                                             | Assessment POD BMR same as batch processing BMR? |
|--------|------------------------------|--------|------------------------------|------------------------------|----------------------------------|-----------------------------------|-------------------------|---------------------|-----------------------------|-----------------------------------------------------------------------------------------------------------------------------------------------------------------------------------------------------------------------------------------------------------------------------------------------------------------------------------------------------------------------------------------------------------------------------------------------------------------------------------------------------------------------------------------------------------------------------------------------------------------------------|--------------------------------------------------|
| 79345  | 1,1,2,2-Tetrachloroethane    | IRIS   | organ weight                 | 1SD                          | 11.850                           | 9.066                             | 15                      | BMDL1SD             | 1SD                         | In this case, a BMR associated with a change of 1 SD from the control mean was selected under an assumption that it represents a minimally biologically significant change                                                                                                                                                                                                                                                                                                                                                                                                                                                  | same                                             |
| 91576  | 2-Methylnaphthalene          | IRIS   | nonneoplastic histopathology | 10%                          | 12.011                           | 8.353                             | 3.5                     | BMDL5               | 5%                          | A benchmark response level of 5% extra risk of the critical effect, pulmonary alveolar proteinosis, was selected for this assessment. This effect is similar to a disorder of unknown etiology that has been identified in humans. If this disorder were to occur in humans following exposure to 2-methylnaphthalene, it is anticipated that children may be more susceptible especially since children affected with the disorder often experience more severe symptoms than adults. Thus, a 5% extra risk of pulmonary alveolar proteinosis was judged to be an appropriate level of extra risk for this critical effect | different                                        |
| 115968 | Tris(2-chloroethyl)phosphate | PPRTV  | organ weight                 | 1SD                          | 12.542                           | 7.411                             | 6.9                     | BMDL                | 1SD                         | For a dose-dependent increase in relative kidney weight in female rats treated with TCEP for 16 weeks, a default benchmark response (BMR) of 1 standard deviation (SD) from the control mean was used in modeling this endpoint                                                                                                                                                                                                                                                                                                                                                                                             | same                                             |
| 57125  | Cyanide ion                  | IRIS   | organ weight                 | 1SD                          | 12.757                           | 5.484                             | 1.9                     | BMDL1SD             | 1SD                         | The BMR for continuous data of 1 SD change in the control mean was selected under the assumption that it represents a minimally biologically significant response level                                                                                                                                                                                                                                                                                                                                                                                                                                                     | same                                             |

| CAS    | Chemical Name              | Source | Effect                       | BMR used in batch processing | Lowest BMD from batch processing | Lowest BMDL from batch processing | Original assessment POD | Effect Level of POD | Original assessment POD BMR | Reason for selection of POD BMR                                                                                                                                                                                                                                                                                                                                                           | Assessment POD BMR same as batch processing BMR? |
|--------|----------------------------|--------|------------------------------|------------------------------|----------------------------------|-----------------------------------|-------------------------|---------------------|-----------------------------|-------------------------------------------------------------------------------------------------------------------------------------------------------------------------------------------------------------------------------------------------------------------------------------------------------------------------------------------------------------------------------------------|--------------------------------------------------|
| 99990  | Nitrotoluene, p-           | PPRTV  | nonneoplastic histopathology | 10%                          | 14.914                           | 2.239                             | 1.1                     | BMDL                | 10%                         | Rationale not provided                                                                                                                                                                                                                                                                                                                                                                    | same                                             |
| 156605 | trans-1,2-Dichloroethylene | IRIS   | other                        | 1SD                          | 45.980                           | 13.322                            | 5.1                     | BMDL10              | 10%                         | In this case, a BMR of 1 standard deviation in spleen cell antibody production was selected under an assumption that it represents a minimal biologically significant change                                                                                                                                                                                                              | different                                        |
| 108861 | Bromobenzene               | IRIS   | nonneoplastic histopathology | 10%                          | 46.079                           | 4.536                             | 24.1                    | BMDL10              | 10%                         | significant biological response level for the observed spleen effects                                                                                                                                                                                                                                                                                                                     | same                                             |
| 88722  | Nitrotoluene, o-           | PPRTV  | nonneoplastic histopathology | 10%                          | 60.676                           | 46.075                            | 0.94                    | BMDL                | 10%                         | The BMD Lower Confidence Limit for a 10% response (BMDL10) was chosen                                                                                                                                                                                                                                                                                                                     | same                                             |
| 75092  | Dichloromethane            | IRIS   | nonneoplastic histopathology | 10%                          | 70.687                           | 51.424                            | 0.19                    | BMDL(HED)           | 1%                          | based on current BMD guidance (U.S. EPA, 2000).                                                                                                                                                                                                                                                                                                                                           | different                                        |
| 108883 | Toluene                    | IRIS   | organ weight                 | 1SD                          | 70.705                           | 52.845                            | 238                     | BMDL                | 1SD                         | Rationale not provided                                                                                                                                                                                                                                                                                                                                                                    | same                                             |
| 111762 | 2-Butoxyethanol            | IRIS   | nonneoplastic histopathology | 10%                          | 71.530                           | 54.472                            | 1.4                     | BMDL(HED)           | 10%                         | In this case, EPA concluded a 10% increase in hemosiderin staining, indicating a precursor to an adverse effect, is appropriate for use in deriving the RfD under the assumption that it represents a minimal biologically significant change.                                                                                                                                            | same                                             |
| 591786 | 2-Hexanone                 | IRIS   | gross pathology              | 10%                          | 96.894                           | 23.229                            | 5                       | BMDL10              | 10%                         | The POD was defined as the 95% lower confidence limit on the BMD (BMDL) associated with a benchmark response (BMR) of 10% extra risk of axonal swelling. A BMR of 10% is generally used in the absence of information regarding what level of change is considered biologically significant, and also to facilitate a consistent basis of comparison across assessments (U.S. EPA, 2000). | same                                             |
| 108952 | Phenol                     | IRIS   | body weight                  | 1SD                          | 152.051                          | 124.591                           | 93                      | BMDL                | 1SD                         | Rationale not provided                                                                                                                                                                                                                                                                                                                                                                    | same                                             |

| CAS    | Chemical Name                           | Source | Effect                       | BMR used in batch processing | Lowest BMD from batch processing | Lowest BMDL from batch processing | Original assessment POD | Effect Level of POD | Original assessment POD BMR | Reason for selection of POD BMR                                                                                                                                                                                                                                                                                                                                                                                                              | Assessment POD BMR same as batch processing BMR? |
|--------|-----------------------------------------|--------|------------------------------|------------------------------|----------------------------------|-----------------------------------|-------------------------|---------------------|-----------------------------|----------------------------------------------------------------------------------------------------------------------------------------------------------------------------------------------------------------------------------------------------------------------------------------------------------------------------------------------------------------------------------------------------------------------------------------------|--------------------------------------------------|
| 79016  | Trichloroethene                         | IRIS   | development                  | 10%                          | 161.322                          | 17.036                            | 0.0051                  | BMDL01(HE D99)      | 1%                          | benchmark response (BMR) = 1% extra risk (due to severity of defects, some of which could have been fatal)                                                                                                                                                                                                                                                                                                                                   | different                                        |
| 112345 | Diethylene Glycol Monobutyl Ether       | PPRTV  | hematology                   | 1SD                          | 222.310                          | 81.408                            | 81                      | BMDL                | 1SD                         | In the absence of a biologically relevant response level, the benchmark response (BMR) was chosen to be 1 standard deviation (SD) from the control mean, as recommended by U.S. EPA (2000).                                                                                                                                                                                                                                                  | same                                             |
| 104518 | Butylbenzene, n-                        | PPRTV  | nonneoplastic histopathology | 10%                          | 244.517                          | 136.737                           | 137                     | BMDL                | 10%                         | In accordance with U.S. EPA (2000) guidance, benchmark doses (BMDs) and lower bounds on the BMD (BMDLs) associated with an extra risk of 10% (BMD10 and BMDL10) are calculated for all models                                                                                                                                                                                                                                                | same                                             |
| 111159 | Ethylene Glycol Monoethyl Ether Acetate | PPRTV  | organ weight                 | 1SD                          | 473.960                          | 356.646                           | 356                     | BMDL                | 1SD                         | The models are run with a BMR of 1 SD from the control mean, as recommended by EPA (2000).                                                                                                                                                                                                                                                                                                                                                   | same                                             |
| 109999 | Tetrahydrofuran                         | IRIS   | body weight                  | 1SD                          | 955.658                          | 749.906                           | 928                     | BMDL1SD             | 1SD                         | the control mean, as recommended by EPA (2000).                                                                                                                                                                                                                                                                                                                                                                                              | same                                             |
| 78922  | Butyl alcohol, sec-                     | PPRTV  | development                  | 1SD                          | 1467.170                         | 1044.000                          | 657                     | BMD                 | 5%                          | In the case of pup or fetal body weight, there is no specific decrement that is generally regarded as indicative of an adverse response. Consequently, for each generation, a 5% decrease in the mean pup or fetus body weight per litter (compared with the control mean) was selected as the benchmark response because it was a response rate that fell within the range of experimental dose levels used in the Cox et al. (1975) study. | different                                        |

| CAS   | Chemical Name         | Source | Effect      | BMR used in batch processing | Lowest BMD from batch processing | Lowest BMDL from batch processing | Original assessment POD | Effect Level of POD | Original assessment POD BMR | Reason for selection of POD BMR                                                                                                                                                                                                | Assessment POD BMR same as batch processing BMR? |
|-------|-----------------------|--------|-------------|------------------------------|----------------------------------|-----------------------------------|-------------------------|---------------------|-----------------------------|--------------------------------------------------------------------------------------------------------------------------------------------------------------------------------------------------------------------------------|--------------------------------------------------|
| 71556 | 1,1,1-Trichloroethane | IRIS   | body weight | 1SD                          | 3030.650                         | 1166.170                          | 2155                    | BMDL                | 10%                         | A 10% change in mean terminal body weight relative to the control mean was selected as the benchmark response (BMR) level as the minimal level of change generally considered to be biologically significant (U.S. EPA, 2000). | different                                        |
